# Supplementary material
Source: PubMed Central journal article supplement (PMC5429171)
Supplement: NIHMS861363-supplement-1.pdf [file NIHMS861363-supplement-1.pdf]

## **Sites and research teams - contributors**

**We acknowledge the contributions of the following sites and individuals who made the THAPCA-OH Trial possible.**

Site principal investigators (PI), Sub-investigators (Sub-I), Clinical research coordinators (CRC), Neurologists (Neurologist), Psychologists (Psychologist).

Underline indicates is coauthor.

### **The Children's Hospital of Alabama, Birmingham, AL**

J. Alten (PI), S. Borasino (Sub-I), K. Hock (CRC), L. Dure (Neurologist), D. Marullo (Psychologist)

### **Phoenix Children's Hospital, Phoenix, AZ**

H. Dalton (PI), S. Buttram (Sub-I), K. Wai (Sub-I), A. La Bell (CRC), C. Bliss (CRC), D. Liss (CRC), A. Ortiz (CRC), C. Downhour (CRC), K. Williams (Neurologist), M. Lavoie (Psychologist), V. Bordes-Edgar (Psychologist)

### **Diamond Children's Medical Center, Tucson, AZ**

A. Theodorou (PI), K. Typpo (Sub-I), C. Wells (CRC), J. Deschenes (CRC), J. Teodori (Neurologist), C. Viscusi (Sub-I), J. Katsanis (Psychologist)

### **Children's Hospital of Los Angeles, Los Angeles, CA**

C. Newth (PI), S. Rubin (Sub-I), R. Bart (Sub-I), T. Deakers (Sub-I), A. Bhalla (Sub-I), B. Markovitz (Sub-I), J. DiCarlo (Sub-I), P. Ross (Sub-I), V. Wang (Sub-I), M. Villa (CRC), F. Fajardo (CRC), J. Kwok (CRC), J. Serrano (CRC), J. Valentine (CRC), A. Yamakawa (CRC), S. Briones (CRC), S. Cauley (RN), A. Briseno (RN), C. Young (RN), M. Nyc (CRC), T. Rosser (Neurologist), J. Gold (Psychologist), R. Engilman (Psychometrician)

### **Children's Hospital of Orange County, Orange County, CA**

A Schwarz (PI), J. Haykawa (Sub-I), O. Vargas-Shiraishi (CRC), A. Galion (Neurologist)

### **Loma Linda University Children's Hospital, Loma Linda, CA**

M. Mathur (PI), G. Oei (Sub-I), B. Barcega (Sub-I), J. Newcombe (CRC), A. Pinto (CRC), S. Ashwal (Neurologist), J. Pivonka-Jones (Neuropsychologist)

**University of California Los Angeles, Los Angeles, CA**

R. Harrison (PI), R. Kelly (Sub-I), A. Madikians (Sub-I), M. Federman (Sub-I), M. Morgan (Sub-I), A. Yamakawa (CRC), M. Nyc (CRC), S. Briones (CRC), M. Villa (CRC), J. Kwok (CRC), J. Serrano (CRC), J. Valentine (CRC), T. Rosser (Neurologist), R. Engilman (Psychometrician), J. Gold (Psychologist)

**UCSF Benioff Children's Hospital, San Francisco, CA**

P. McQuillen (PI), S. Tabbutt (Sub-I), L. Haeusslein (CRC), S. Strong (CRC), H. Glass (Neurologist), B. Johnson (Psychologist), B. Loomis (Psychologist), D. Gano (Neurologist)

**Hospital for Sick Children, Toronto, Toronto, ON, Canada**

J. Hutchison (PI), S. Schwartz (Sub-I), A. Guerguerian (Sub-I), K. Boutis (Sub-I), D. Clark (CRC), J. Van Huyse (CRC), K. Fusco (CRC), K. McBain (CRC), A. Krancevic (CRC), L. Toller (CRC), R. Gaitero (CRC), S. Furness (CRC), R. Askalan (Neurologist), C. Hahn (Neurologist), R. Sananes (Psychologist)

**Children's Hospital of Colorado, Denver, CO**

E. Dobyns (PI), L. Rappaport (Sub-I), E. Jewett (CRC), T. Wilson (CRC), B. Wathen (CRC), M. Dix (CRC), J. Allen (CRC), T. Garling (CRC), D. DiDomenico (CRC), D. Loyola (CRC), T. Bernard (Neurologist), J. Dise-Lewis (Psychologist)

**Children's Healthcare of Atlanta, Atlanta, GA**

N. Pham (PI), K. Walson (Sub-I), J. Sturm (Sub-I), C. Stone (CRC), A. Wellons (CRC), S. Meisner (CRC), B. Weissman (Neurologist), A. Alexander (Psychologist), A. Johnson (Psychologist)

**Robert Lurie Children's Hospital of Chicago, Chicago, IL**

D. Goodman (PI), C. Smith (PI), E. Powell (Sub-I), S. Shah (CRC), J. Chiambretti (CRC), C. Lutz (CRC), C. Vitt (CRC), L. Jackson-McCarthy (CRC), N. Leannais (CRC), M. Wainwright (Neurologist), J. Goldstein (Neurologist), C. Weil (Psychologist)

**Kosair Charities Pediatric Clinical Research Unit, Department of Pediatrics, University of Louisville and the Kosair Children's Hospital, Louisville, KY**

M. Porter (PI), J. Sullivan (Sub-I), M. Ruppe (Sub – I), J. Berkenbosch (Sub-I),  
M. McDonald (Sub-I), A. Calhoun (Sub-I), M. Thomas (CRC), A. Michael (CRC), J. Nason  
(CRC), K. Kernen (CRC), V. Puri (Neurologist), L. Sears (Psychologist)

**Johns Hopkins Children’s Center, Baltimore, MD**

U. Bhalala (PI), J.K. Lee (PI), M. Bembea (PI), D. H. Shaffner (Sub-I), A. Walker (Sub-I), M.  
Shackelford (CRC), A. Larson (CRC), J. Jamrogowicz (CRC), J. Kim (CRC), R. Felling  
(Neurologist), B. Slomine (Psychologist)

**Outcome Center, Kennedy Krieger Institute, Baltimore, MD**

J.R. Christensen (Site PI), B.S. Slomine (Site Co-Investigator), E. DeMatt (Telephone  
Interviewer), M. Talley (Telephone Interviewer), C. Rodweller (Telephone Interviewer)

**Children’s Hospital of Michigan, Detroit, MI**

K. Meert (PI), S. Heidemann (Sub-I), J. Clark (Sub-I), A. Pawluszka (CRC), M. Lulic (RA), M.  
Frey (CRC), L. Sivaswamy (Neurologist), S. Horman (Psychometrician), L. Chiodo  
(Psychologist)

**C.S. Mott Children’s Hospital, University of Michigan, Ann Arbor, MI**

F. Moler (PI), T. Cornell (Sub-I), M. Weber (CRC), J. Reske (CRC), L. Conlin (CRC), F.  
Silverstein (Neurologist), M. Carlson (Neurologist), S. Warschausky (Psychologist), C. Young  
(Psychologist), T. Behnke (Program Administrator), D. Poszywak (Procurement Subcontract  
Administrator)

*“Research reported in this publication was supported by the National Center for Advancing  
Translational Sciences of the National Institutes of Health under Award Numbers UL1 TR  
000433 and UL1 TR 000433. The content is solely the responsibility of the authors and does  
not necessarily represent the official views of the National Institutes of Health.”*

**Children’s Hospital and Clinics of Minnesota, Minneapolis, MN**

J. Nowak (PI), H. Ortega (EM Sub-I), D. Milner (EM Sub-I), E. Zielinski (CRC), A. Overman  
(CRC), C. Leonard (CRC), E. Gilles (Neurologist), P. Huszar (Neurologist), M. Troy  
(Psychologist), J. Alden (Psychologist)

**Washington University in St. Louis, St. Louis, MO**

J. Pineda (PI), P. Oren (Sub-I), M. Shoykhet (Sub-I), S. Friess (Sub-I), K. Williams (Sub-I), D. Jaffe (Sub-I), T. Day (CRC), T. Hicks (CRC), L. Borganier (CRC), E. Fish (CRC), L. Toennies (CRC), P. Thurst (CRC), S. Blankenship (CRC), M. Noetzel (Neurologist), K. Williams (Neurologist), D. White (Psychologist)

"This research was supported by the Washington University Intellectual and Developmental Disabilities Research Center with funding from the National Institute of Child Health and Human Development (P30HD062171)."

**Children's Hospital of New York/Columbia University Medical Center New York, NY**

C. Schleien (PI), D. Schnadower (Sub-I), N. Talathoti (CRC), N. Sidhu (Neurologist), V. Hinton (Psychologist)

**University of Rochester Medical Center/Golisano Children's Hospital, Rochester, NY**

E. van der Jagt, (PI), E. R. Taillie (CRC), E. Nazarian (Sub-I), L. E. Daugherty (Sub-I), C.O. Davis (Sub-I), J. Mulbury (Neurologist), H. Adams (Psychologist)

**Duke Children's Hospital, Durham, NC**

G. Ofori-Amanfo (PI), S. Wrenn (CRC), T. Uhl (CRC), C. Milleson (CRC), K. Gustafson (Psychologist), S. Asbeck (Psychologist), W. Gallentine (Neurologist)

**Nationwide Children's Hospital, Columbus, OH**

E. Lloyd (PI), M. Hall (Sub-I), N. Khan (Sub-I), W. J. Frazier (Sub-I), Daniel Cohen (Sub-I), J. Haines (CRC), K. Carter (CRC), L. Bird (CRC), S. Hough (CRC), W. Lo (Neurologist), K. Yeates (Psychologist), K. Morfing (Psychologist)

**Cincinnati Children's Hospital, Cincinnati, OH**

D. Wheeler (PI), G. Geis (Sub-I), E. Beckman (CRC), S. Banschbach (CRC), M. Monaco (CRC), B. Hallinan (Neurologist), N. Walz (Psychologist)

**Rainbow Babies and Children's Hospital, Cleveland, OH**

K. Lidsky (PI), S. Bergant (CRC), A. Browning (CRC), J. Haky (CRC), N. Bass (Neurologist), R. Tangen (Psychologist)

**Penn State Children's Hospital, Hershey, PA**

N. Thomas (PI), A. Shelly (CRC), J. Vallati (CRC), P. Carper (CRC), D. Spear (CRC), A. McMonagle (CRC), J. Stokes (CRC), H. Watts (CRC), W. Trescher (Neurologist), C. Flaherty-Craig (Psychologist)

**Children's Hospital of Philadelphia, Philadelphia, PA**

A. Topjian (PI), B. Berg (Sub-I), V. Nadkarni (Sub-I), S. Friess (Sub-I), J. Fitzgerald (Sub-I), P. Meaney (Sub-I), E. Alpern (EM Sub-I), M. DiLiberto (CRC), C. Twelves (CRC), S. McGowan (CRC), M. Sisko (CRC), B. Park (CRC), R. Ichord (Neurologist), J. Radcliffe (Psychologist), N. Hattiangadi Thomas (Psychologist), K. Friedman (Psychologist), A. Sullivan (Psychometrist)

*"The project described was supported by the National Center for Research Resources and the National Center for Advancing Translational Sciences, National Institutes of Health, through Grant UL1TR000003. The content is solely the responsibility of the authors and does not necessarily represent the official views of the NIH."*

**University of Pittsburgh Medical Center, Pittsburgh, PA**

E. Fink (PI), R. Hickey (Sub-I), R. Clark (Planning Committee), M. Bell (Sub-I), A. Abraham (CRC), R. Varma (Neurologist), S. Beers (Psychologist), H. Feldman (Psychologist), J. Walters (Psychologist)

**University of Tennessee Health Science Center, Memphis, TN**

S. Shah (PI), K. Anand (Sub-I), C. Woodward (Sub-I), A. Hickerson (CRC), B. Moore (CRC), A. Nico West (CRC), M. Grandberry (CRC), N. Shah (Neurologist), N. Clanton (Psychologist), A. Adamson (Psychologist), L. Berkelhammer (Psychologist), O. King (Psychologist), A. Huling (Psychologist), L. White (Psychologist)

**Children's Medical Center Dallas, University of Texas Southwestern Medical School, Dallas, TX**

J. Koch (PI), P. Okada (Sub-I), D. Miles (Sub-I), L. Raman (Sub-I), M. Green (Sub-I), E. Golson (CRC), A. Jones (CRC), D. Kelly (CRC), P. Plumb (CRC), K. Van de Bruinhorst (CRC), M. Dowling (Neurologist), P. Stavinoha (Psychologist), A. Hernandez (Psychometrician)

**University of Texas Health Sciences Center at San Antonio, San Antonio, TX**

T. Wu (PI), C. Bauerfeld (Sub-I), M. Rodkey (Sub-I), H. Dibrell (CRC), S. Atkinson (Neurologist), L. O'Donnell (Psychologist), J. Eubanks (Psychologist)

### **Data Coordinating Center (DCC), University of Utah, Salt Lake City, UT**

J. M. Dean (PI), R. Holubkov (Biostatistician), B. Browning (Program Director), M. Gildea (Project Manager), R. Kuhn (Project Manager), K. Register (Project Manager), N. Tattersall (Project Manager), A. Vrem (Project Manager) A. Webster (Biostatistician), A. Clark (Biostatistician), K. Page (Biostatistician), J. Wang (Biostatistician), L. Herrera (Data Manager), J. Yearley (Director Data Management), R. Enriquez (Director Information Technology/Information Systems), D. Demarco (Data Center Manager), M. Virtosu (Senior Software Engineer), J. Bell (Senior Database Developer), S. Zuspan (PECARN Program Director), J. Burr (CPCCRN Program Director), S. Simmons (Information Coordinator), V. McKean (Administrative Assistant), C. Traeden (Administrative Assistant), H. Nitsuma (Administrative Assistant)

### **Primary Children's Medical Center, Salt Lake City, UT**

K.S. Bennett (PI), R. Lane (Sub-I), J. Lilley (CRC), S. Bjerregaard (CRC), K. Jacobsen (CRC), A. Watson, (CRC), D. Stephens (CRC), M. Delacruz (CRC), K. Cooley (CRC), N. Kwendakwema (CRC), B. Ameel (CRC), G. Jensen (CRC), M. Metcalf (CRC), R. Cole (CRC), R. Moore (CRC), D. Morita (Neurologist), R. Burr (Psychologist), T. Bennett (Sub-I), J. Henricksen (PICU MD), E. Hirshberg (Sub-I), A. Hubbard (Sub-I), G. Larsen (Sub-I), B. Poss (Sub-I), M. Schober (Sub-I), J. Sweney (Sub-I)

### **Seattle Children's Hospital, Seattle, WA**

J. Zimmerman (PI), J. McGuire (Sub-I), R. Farris (Sub-I), O. Yanay (Sub-I), J. Reid (Sub-I), L. Smith (Sub-I), S. Hamilton (CRC), R. Barker (CRC), S. Gospe (Neurologist), C. Amlie-Lefond (Neurologist), D. Breiger (Psychologist), A. Paolozzi (Psychologist)

### **Children's National Medical Center, Washington, DC**

J. Berger (PI), D. Wessel (Sub-I), M. Sharron (Sub-I), S. Basu (Sub-I), A. Wratney (Sub-I), N. Dean (Sub-I), K. Brown (Sub-I), J. Reardon (CRC), E. Tomanio (CRC), F. Ramos (RA), , J. Carpenter (Neurologist), S. Swanson (Psychologist), T. Brennan (Psychologist), P. Glass (Psychologist), B. Malek (Psychologist), M. Mintz (Psychologist)

*Our follow ups were conducted in the Clinical Research Center which is supported by NIH P30HD040677.*

**Medical College of Wisconsin, Milwaukee, WI**

M.T. Meyer (PI), M. Wakeham (Sub-I), S. Hanson (Sub-I), Marc Gorelick (Sub-I), M. Christensen (CRC), D. Triscari (CRC), B. Horn (CRC), K. Murkowski (CRC), K. Hecox (Neurologist), C. Brosig (Psychologist)

**NHLBI**

V. Pemberton, J. Kaltman, J. Troendle, G. Pearson

**DSMB**

A. Zaritsky, MD (Chair), (Pediatric Critical Care), Eastern Virginia University, Norfolk, VA

A. Atz, MD, (Pediatric Cardiology and Intensive Care), Medical University of South Carolina, Charleston, SC

D. Glidden, PhD, (Biostatistics), University of California San Francisco, San Francisco, CA

J. Lantos, MD, (Bioethics), Children's Mercy Hospitals, Kansas City, MO

M. Gausche-Hill, MD, (Pediatric Emergency Medicine), Harbor-UCLA, Torrance, CA

G. Holmes, MD (Neurology), University of Vermont College of Medicine, Burlington, VT

R. Ehrenkranz, MD, (Neonatology), Yale University, New Haven, CT

**Executive Committee**

F. Moler, MD, MS

J. M. Dean, MD, MBA

R. Holubkov, PhD

K. Meert, MD

J. Hutchison, MD

V. Nadkarni, MD

N. Kuppermann, MD, MPH

S. Shankaran, MD

F. Silverstein, MD

J. Christensen, MD

V. Pemberton, RNC, MS

C. Nicholson, MD, MS

T. Singh Weik, DrPH
