# Supplementary material
Source: PubMed Central journal article supplement (PMC5429171)
Supplement: NIHMS861363-supplement-2.pdf [file NIHMS861363-supplement-2.pdf]

Table S1a. Vineland Adaptive Behavior Composite and Domain Scores [Drowning only] at One Year Follow-Up

| <b>Score Categories</b>      | <b>Adaptive Behavior Composite<br/>N (%)</b> | <b>Communication Skills*<br/>N (%)</b> | <b>Daily Living Skills*<br/>N (%)</b> | <b>Socialization Skills*<br/>N (%)</b> | <b>Motor Skills*<br/>N (%)</b> |
|------------------------------|----------------------------------------------|----------------------------------------|---------------------------------------|----------------------------------------|--------------------------------|
| < 50 (severely deficient)    | 10 (33.3%)                                   | 9 (30.0%)                              | 12 (40.0%)                            | 7 (23.3%)                              | 10 (33.3%)                     |
| 50 - 69 (well below average) | 4 (13.3%)                                    | 5 (16.7%)                              | 2 (6.7%)                              | 5 (16.7%)                              | 5 (16.7%)                      |
| 70 - 84 (below average)      | 4 (13.3%)                                    | 3 (10.0%)                              | 3 (10.0%)                             | 4 (13.3%)                              | 1 (3.3%)                       |
| 85 - 115 (average)           | 11 (36.7%)                                   | 11 (36.7%)                             | 12 (40.0%)                            | 12 (40.0%)                             | 14 (46.7%)                     |
| > 115 (above average)        | 1 (3.3%)                                     | 2 (6.7%)                               | 1 (3.3%)                              | 2 (6.7%)                               | 0 (0%)                         |

\*Scores were transformed to correspond to a scale with mean 100 and standard deviation 15.

Table S1b. Vineland Adaptive Behavior Composite and Domain Scores [Other Etiologies only] at One Year Follow-Up

| <b>Score Categories</b>      | <b>Adaptive Behavior Composite<br/>N (%)</b> | <b>Communication Skills*<br/>N (%)</b> | <b>Daily Living Skills*<br/>N (%)</b> | <b>Socialization Skills*<br/>N (%)</b> | <b>Motor Skills*<br/>N (%)</b> |
|------------------------------|----------------------------------------------|----------------------------------------|---------------------------------------|----------------------------------------|--------------------------------|
| < 50 (severely deficient)    | 14 (48.3%)                                   | 14 (48.3%)                             | 15 (51.7%)                            | 10 (34.5%)                             | 14 (48.3%)                     |
| 50 - 69 (well below average) | 6 (20.7%)                                    | 4 (13.8%)                              | 7 (24.1%)                             | 5 (17.2%)                              | 8 (27.6%)                      |
| 70 - 84 (below average)      | 4 (13.8%)                                    | 5 (17.2%)                              | 2 (6.9%)                              | 5 (17.2%)                              | 3 (10.3%)                      |
| 85 - 115 (average)           | 5 (17.2%)                                    | 6 (20.7%)                              | 5 (17.2%)                             | 9 (31.0%)                              | 3 (10.3%)                      |
| > 115 (above average)        | 0 (0%)                                       | 0 (0%)                                 | 0 (0%)                                | 0 (0%)                                 | 1 (3.4%)                       |

\*Scores were transformed to correspond to a scale with mean 100 and standard deviation 15.
