# Supplementary material
Source: PubMed Central journal article supplement (PMC5429171)
Supplement: NIHMS861363-supplement-3.pdf [file NIHMS861363-supplement-3.pdf]

Table S2a. Mullen Scales of Early Learning Composite and Scale Scores for Children < 6 years old at One Year Follow-Up [Drowning only] (N = 15)

| <b>Score Categories</b>      | <b>Early Learning Composite<br/>N (%)</b> | <b>Visual Reception*<br/>N (%)</b> | <b>Fine Motor*<br/>N (%)</b> | <b>Receptive Language*<br/>N (%)</b> | <b>Expressive Language*<br/>N (%)</b> |
|------------------------------|-------------------------------------------|------------------------------------|------------------------------|--------------------------------------|---------------------------------------|
| Lowest possible score/49     | 6 (40.0%)                                 | 5 (33.3%)                          | 7 (46.7%)                    | 5 (33.3%)                            | 7 (46.7%)                             |
| 50 - 69 (well below average) | 2 (13.3%)                                 | 2 (13.3%)                          | 1 (6.7%)                     | 2 (13.3%)                            | 2 (13.3%)                             |
| 70 - 84 (below average)      | 1 (6.7%)                                  | 1 (6.7%)                           | 0 (0%)                       | 1 (6.7%)                             | 1 (6.7%)                              |
| 85 - 115 (average)           | 1 (6.7%)                                  | 2 (13.3%)                          | 4 (26.7%)                    | 5 (33.3%)                            | 4 (26.7%)                             |
| > 115 (above average)        | 5 (33.3%)                                 | 5 (33.3%)                          | 3 (20.0%)                    | 2 (13.3%)                            | 1 (6.7%)                              |

\*Scores were transformed to correspond to a scale with mean 100 and standard deviation 15.

Table S2b. Mullen Scales of Early Learning Composite and Scale Scores for Children < 6 years old at One Year Follow-Up [Other Etiologies only] (N = 17)

| <b>Score Categories</b>      | <b>Early Learning Composite<br/>N (%)</b> | <b>Visual Reception*<br/>N (%)</b> | <b>Fine Motor*<br/>N (%)</b> | <b>Receptive Language*<br/>N (%)</b> | <b>Expressive Language*<br/>N (%)</b> |
|------------------------------|-------------------------------------------|------------------------------------|------------------------------|--------------------------------------|---------------------------------------|
| Lowest possible score/49     | 11 (64.7%)                                | 10 (58.8%)                         | 11 (64.7%)                   | 10 (58.8%)                           | 12 (70.6%)                            |
| 50 - 69 (well below average) | 4 (23.5%)                                 | 3 (17.6%)                          | 1 (5.9%)                     | 5 (29.4%)                            | 4 (23.5%)                             |
| 70 - 84 (below average)      | 2 (11.8%)                                 | 3 (17.6%)                          | 4 (23.5%)                    | 1 (5.9%)                             | 1 (5.9%)                              |
| 85 - 115 (average)           | 0 (0%)                                    | 1 (5.9%)                           | 1 (5.9%)                     | 1 (5.9%)                             | 0 (0%)                                |
| > 115 (above average)        | 0 (0%)                                    | 0 (0%)                             | 0 (0%)                       | 0 (0%)                               | 0 (0%)                                |

\*Scores were transformed to correspond to a scale with mean 100 and standard deviation 15.
