# Supplementary material
Source: PubMed Central journal article supplement (PMC5429171)
Supplement: NIHMS861363-supplement-4.pdf [file NIHMS861363-supplement-4.pdf]

Table S3a. Wechsler Abbreviated Scale of Intelligence Full Scale IQ Composite and Subtest Scores for Children  $\geq 6$  years at One Year Follow-Up [Drowning only] (N = 10)

| <b>Score Categories</b>      | <b>Full Scale IQ<br/>Composite<br/>N (%)</b> | <b>Vocabulary*<br/>N (%)</b> | <b>Matrix<br/>Reasoning*<br/>N (%)</b> |
|------------------------------|----------------------------------------------|------------------------------|----------------------------------------|
| Lowest possible score        | 6 (60.0%)                                    | 6 (60.0%)                    | 6 (60.0%)                              |
| 55 - 69 (well below average) | 1 (10.0%)                                    | 1 (10.0%)                    | 1 (10.0%)                              |
| 70 - 84 (below average)      | 2 (20.0%)                                    | 2 (20.0%)                    | 0 (0%)                                 |
| 85 - 115 (average)           | 1 (10.0%)                                    | 0 (0%)                       | 3 (30.0%)                              |
| > 115 (above average)        | 0 (0%)                                       | 1 (10.0%)                    | 0 (0%)                                 |

\*Scores were transformed to correspond to a scale with mean 100 and standard deviation 15.

Table S3b. Wechsler Abbreviated Scale of Intelligence Full Scale IQ Composite and Subtest Scores for Children  $\geq 6$  years at One Year Follow-Up [Other Etiologies only] (N = 11)

| <b>Score Categories</b>      | <b>Full Scale IQ Composite<br/>N (%)</b> | <b>Vocabulary*<br/>N (%)</b> | <b>Matrix Reasoning*<br/>N (%)</b> |
|------------------------------|------------------------------------------|------------------------------|------------------------------------|
| Lowest possible score        | 8 (72.7%)                                | 8 (72.7%)                    | 8 (72.7%)                          |
| 55 - 69 (well below average) | 0 (0%)                                   | 1 (9.1%)                     | 0 (0%)                             |
| 70 - 84 (below average)      | 1 (9.1%)                                 | 1 (9.1%)                     | 0 (0%)                             |
| 85 - 115 (average)           | 2 (18.2%)                                | 1 (9.1%)                     | 3 (27.3%)                          |
| > 115 (above average)        | 0 (0%)                                   | 0 (0%)                       | 0 (0%)                             |

\*Scores were transformed to correspond to a scale with mean 100 and standard deviation 15.
